# Supplementary material for: Effects of network junctions and defects on the crystallization of model poly(ethylene glycol) networks
Source: Royal Society of Chemistry journal article supplement (doi:10.1039/d2sm01036d), 2023-01-01
Supplement: d2sm01036d1.pdf [file d2sm01036d1.pdf]

## Supporting Information

### Effects of Network Junctions and Defects on Crystallization of Model Poly(ethylene glycol) Networks

*Masashi Ohira<sup>1</sup>, Shintaro Nakagawa<sup>2</sup>, Ryotaro Sampei<sup>3</sup>, Takako Noritomi<sup>3</sup>, Takamasa Sakai<sup>1</sup>, Mitsuhiro Shibayama<sup>3,4</sup>, Xiang Li<sup>5\*</sup>*

*1 Department of Bioengineering, Graduate School of Engineering, The University of Tokyo, 7-3-1 Hongo, Bunkyo-ku, Tokyo, 113-8685, Japan*

*2 Institute of Industrial Science, The University of Tokyo, 4-6-1, Komaba, Meguro-ku, Tokyo 153-8505, Japan*

*3 Neutron Science Laboratory, Institute for Solid State Physics, The University of Tokyo, 5-1-5 Kashiwanoha, Kashiwa, Chiba 277-8581, Japan*

*4 Neutron Science and Technology Center, Comprehensive Research Organization for Science and Society (CROSS), 162-1 Shirakata, Tokai, Naka, Ibaraki, 319-1106, Japan*

*5 Faculty of Advanced Life Science, Hokkaido University, Sapporo 001-0021, Japan*

\*Correspondence to: Xiang Li, [x.li@sci.hokudai.ac.jp](mailto:x.li@sci.hokudai.ac.jp)

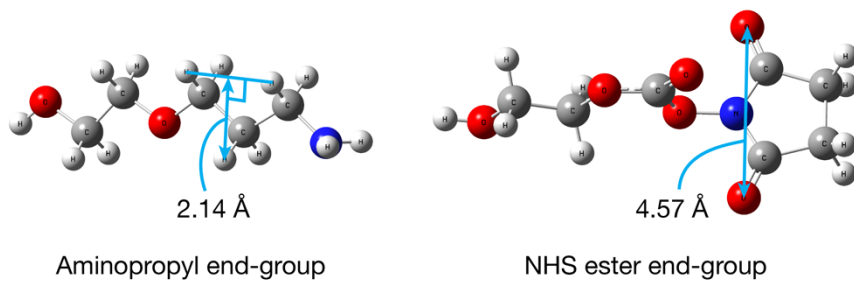

**Fig. S1** Estimation of bulkiness of the end-groups. Model compounds with aminopropyl or NHS ester end-groups attached to ethylene glycol were constructed and the structure was optimized at HF/3-21G level of theory using the Gaussian 16 software. The molecular width was calculated based on the atomic coordinates as shown in the figure.

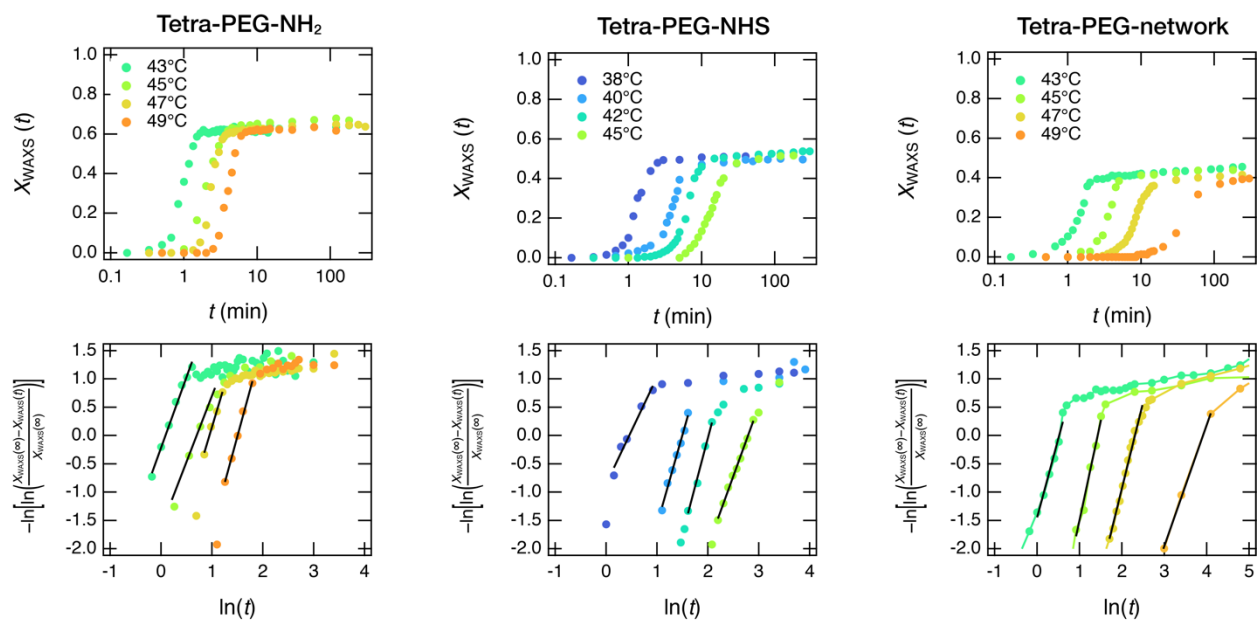

**Fig. S2** The time variation of crystallization degrees  $X_{waxs}(t)$  and Avrami plot in the isothermal crystallization process at various cyclization temperatures. The solid black lines indicate the fitting results of the Avrami equation.

**Table S1** The Avrami exponent  $n$ , half time of crystallization  $t_{1/2}$ , and correlation coefficient  $R^2$  at various cyclization temperatures  $T_c$ .

|                   | $T_c$ (°C) | $n$ | $t_{1/2}$ (min) | $R^2$  |
|-------------------|------------|-----|-----------------|--------|
| Linear-PEG NH2    | 45         | 2.2 | 1.3             | 0.9998 |
|                   | 43         | 1.9 | 0.9             | 0.9905 |
| Tetra-PEG NH2     | 45         | 2.3 | 2.1             | 0.9796 |
|                   | 47         | 3.0 | 2.3             | 0.9923 |
|                   | 49         | 3.2 | 4.0             | 0.9963 |
| Tetra-PEG NHS     | 38         | 1.9 | 1.4             | 0.9695 |
|                   | 40         | 3.2 | 4.4             | 0.9959 |
|                   | 42         | 3.4 | 6.5             | 0.9921 |
|                   | 45         | 2.2 | 14.0            | 0.9940 |
| Tetra-PEG Network | 43         | 2.0 | 1.6             | 0.9741 |
|                   | 45         | 2.6 | 4.3             | 0.9804 |
|                   | 47         | 3.0 | 8.7             | 0.9865 |
|                   | 49         | 2.2 | 42.1            | 0.9994 |

**Table S2** The Avrami exponent  $n$ , half time of crystallization  $t_{1/2}$ , and correlation coefficient at various cyclization temperatures  $T_c$  of PEG network samples.

| $M_{\text{pre}}$ | $C_0$ (wt%) | $n$ | $t_{1/2}$ (min) | $R^2$  |
|------------------|-------------|-----|-----------------|--------|
| 10k              | 1.0         | 3.0 | 92.6            | 0.9805 |
|                  | 2.5         | 2.3 | 67.9            | 0.9948 |
|                  | 5.0         | 3.1 | 71.0            | 0.9988 |
|                  | 10          | 2.5 | 62.7            | 0.9991 |
|                  | 20          | 3.2 | 83.0            | 0.9944 |
| 20k              | 1.0         | 1.7 | 2.4             | 0.9987 |
|                  | 2.5         | 2.3 | 1.0             | 0.9984 |
|                  | 5.0         | 2.5 | 1.3             | 0.9973 |
|                  | 10          | 2.1 | 1.8             | 0.9991 |
|                  | 20          | 1.9 | 1.6             | 0.9860 |
| 40k              | 1.0         | 3.1 | 2.9             | 0.9927 |
|                  | 2.5         | 1.8 | 3.0             | 0.9971 |
|                  | 5.0         | 1.9 | 2.2             | 0.9960 |
|                  | 10          | 2.0 | 4.1             | 0.9988 |
|                  | 20          | 2.8 | 3.7             | 0.9971 |

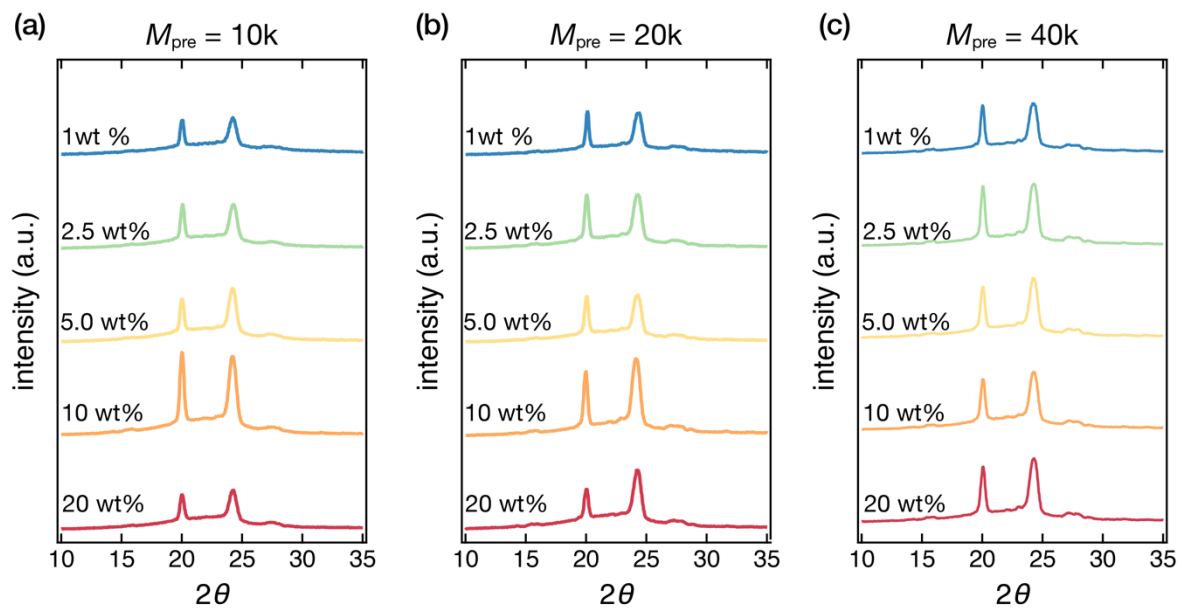

**Fig. S3** 1D-WAXS profiles of tetra-PEG networks after the isothermal crystallization completed at 45 °C.

(a)  $M_{pre} = 10k$ , (b)  $M_{pre} = 20k$ , (c)  $M_{pre} = 40k$ .

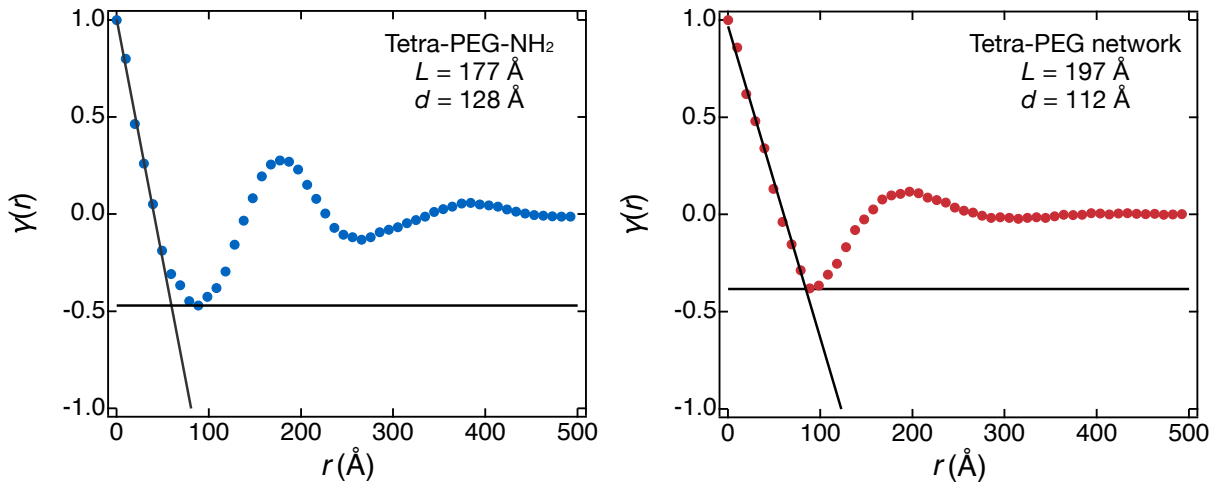

**Fig. S4** Normalized 1D correlation functions  $\gamma(r)$  of tetra-PEG-NH<sub>2</sub> ( $M = 20$  kg/mol) and tetra-PEG network ( $M_{\text{pre}} = 20$  kg/mol,  $c_0 = 20$  wt%) calculated by the Fourier transform of 1D Lorentz-correlated SAXS profiles. SAXS profiles used for Fourier transform in the low  $q$  range ( $q < 0.01 \text{ \AA}^{-1}$ ) were extrapolated by the Guinier law, and the high  $q$  range ( $q > 0.2 \text{ \AA}^{-1}$ ) was extrapolated by the Porod law. The long period  $L$  and the crystal lamellar thickness  $d$  were evaluated based on the approximation of Strobl.
